# Supplementary material for: Real-world retrospective cohort study ARCTIC shows burden of comorbidities in Swedish COPD versus non-COPD patients
Source: PubMed Central journal article supplement (PMC6131165; doi:10.1038/s41533-018-0101-y), 2018-09-10
Supplement: 41533_2018_101_MOESM1_ESM.pdf [file 41533_2018_101_MOESM1_ESM.pdf]

## Methods

**Outcomes:** Following comorbidities defined through diagnosis codes in the primary or secondary care setting were assessed in the study:

|                                                                                                                                |
|--------------------------------------------------------------------------------------------------------------------------------|
| Asthma                                                                                                                         |
| Cardiovascular disease (including ischemic heart disease, arrhythmias, heart failure, stroke, and peripheral vascular disease) |
| Diabetes (both type I and type II)                                                                                             |
| Hyperlipidemia                                                                                                                 |
| Depression, Anxiety                                                                                                            |
| Gastro-esophageal reflux disease                                                                                               |
| Chronic pain                                                                                                                   |
| Cognitive impairment/dementia                                                                                                  |
| Osteoporosis/Fractures                                                                                                         |
| Lung cancer                                                                                                                    |
| Any other cancer                                                                                                               |
| Rhinitis                                                                                                                       |
| Nasal polyps                                                                                                                   |
| Polymyalgia rheumatic                                                                                                          |
| Kidney disease                                                                                                                 |
| Rheumatoid arthritis                                                                                                           |

It was hypothesized that some comorbidities were underreported when evaluated through registered diagnosis codes. Accordingly, following comorbidities were also identified through the use of medication according to the National Prescription Register:

|                                                            |
|------------------------------------------------------------|
| Cardiovascular medication (for conditions mentioned above) |
| Antihypertensive medication                                |
| Medication against cognitive impairment (Alzheimer's)      |
| Proton-pump inhibitors                                     |
| Antidepressants                                            |
| Statins                                                    |
| Central pain killers                                       |
| Sleep medication                                           |
| Bisphosphonates                                            |
| Beta-blockers                                              |
| Nasal corticosteroids                                      |
| Diabetes medication                                        |

In addition, the following comorbidities (events related to inhaled corticosteroid use) were defined through diagnosis codes/injury codes in primary or secondary care:

|                                                                                                                       |
|-----------------------------------------------------------------------------------------------------------------------|
| Pneumonia                                                                                                             |
| Infection (Tuberculosis, Lower respiratory tract infections (including Acute bronchitis) and Urinary tract infection) |
| Cataracts                                                                                                             |
| Oral candida infection                                                                                                |
| Osteoporosis/Fractures                                                                                                |
| Gastric and Duodenal ulcers                                                                                           |

## Results

**Table S1 Percent of patients with comorbidities in case-control population (>5 fold increase in COPD; 2 years before and after index date)**

| Disease                                                                                                                                                                                         | COPD population | Reference population | Factor increased |
|-------------------------------------------------------------------------------------------------------------------------------------------------------------------------------------------------|-----------------|----------------------|------------------|
| Emphysema - J43                                                                                                                                                                                 | 1400 (8.01)     | 168 (0.20)           | 40.05            |
| Respiratory failure, not elsewhere classified - J96                                                                                                                                             | 1944 (11.12)    | 559 (0.66)           | 16.85            |
| Unspecified chronic bronchitis - J42                                                                                                                                                            | 1027 (5.88)     | 404 (0.48)           | 12.25            |
| Surgical operation and other surgical procedures as the cause of abnormal reaction of the patient, or of later complication, without mention of misadventure at the time of the procedure - Y83 | 638 (3.65)      | 267 (0.32)           | 11.41            |
| Unspecified fall - W19                                                                                                                                                                          | 564 (3.23)      | 267 (0.32)           | 10.09            |
| Problems related to lifestyle - Z72                                                                                                                                                             | 1332 (7.62)     | 693 (0.82)           | 9.29             |
| Other pulmonary heart diseases - I27                                                                                                                                                            | 423 (2.42)      | 231 (0.27)           | 8.96             |
| Fall on same level from slipping, tripping and stumbling - W01                                                                                                                                  | 1175 (6.72)     | 694 (0.82)           | 8.2              |
| Nicotine dependence - F17                                                                                                                                                                       | 2214 (12.67)    | 1310 (1.55)          | 8.17             |
| Abnormal findings on diagnostic imaging of lung - R91                                                                                                                                           | 1276 (7.30)     | 994 (1.18)           | 6.19             |
| Malignant neoplasm of bronchus and lung - C34                                                                                                                                                   | 1091 (6.24)     | 883 (1.05)           | 5.94             |
| Other respiratory disorders - J98                                                                                                                                                               | 538 (3.08)      | 458 (0.54)           | 5.7              |
| Dependence on enabling machines and devices, not elsewhere classified - Z99                                                                                                                     | 494 (2.83)      | 473 (0.56)           | 5.05             |

COPD, chronic obstructive pulmonary disease

**Table S2 Percent of patients with comorbidities in case-control population (>3 fold increase in COPD; 2 years before and after index date)**

| Disease                                                                                                                                    | COPD population | Reference population | Factor increased |
|--------------------------------------------------------------------------------------------------------------------------------------------|-----------------|----------------------|------------------|
| Neoplasm of uncertain behavior of middle ear and respiratory and intrathoracic organs - D38                                                | 854 (4.89)      | 902 (1.07)           | 4.57             |
| Bacterial pneumonia, not elsewhere classified - J15                                                                                        | 1904 (10.89)    | 2047 (2.42)          | 4.5              |
| Aortic aneurysm and dissection - I71                                                                                                       | 825 (4.72)      | 937 (1.11)           | 4.25             |
| Streptococcus, Staphylococcus, and Enterococcus as the cause of diseases classified elsewhere - B95                                        | 594 (3.40)      | 708 (0.84)           | 4.05             |
| Other bacterial agents as the cause of diseases classified elsewhere - B96                                                                 | 1024 (5.86)     | 1261 (1.49)          | 3.93             |
| Occupant of heavy transport vehicle injured in non-collision transport accident - V68                                                      | 533 (3.05)      | 668 (0.79)           | 3.86             |
| Poisoning by, adverse effect of and under dosing of diuretics and other and unspecified drugs, medicaments and biological substances - T50 | 501 (2.87)      | 662 (0.78)           | 3.68             |
| Personal history of certain other diseases - Z86                                                                                           | 1425 (8.15)     | 1881 (2.23)          | 3.65             |

| Disease                                                           | COPD population | Reference population | Factor increased |
|-------------------------------------------------------------------|-----------------|----------------------|------------------|
| Acute bronchitis - J20                                            | 1856 (10.62)    | 2464 (2.92)          | 3.64             |
| Symptoms and signs concerning food and fluid intake - R63         | 553 (3.16)      | 736 (0.87)           | 3.63             |
| Other peripheral vascular diseases - I73                          | 1159 (6.63)     | 1582 (1.87)          | 3.55             |
| Heart failure - I50                                               | 5350 (30.61)    | 7899 (9.35)          | 3.27             |
| Pneumonia, unspecified organism - J18                             | 5462 (31.25)    | 8304 (9.83)          | 3.18             |
| Abnormalities of breathing - R06                                  | 4767 (27.27)    | 7410 (8.77)          | 3.11             |
| Chronic kidney disease - N18                                      | 1031 (5.90)     | 1647 (1.95)          | 3.03             |
| Volume depletion - E86                                            | 787 (4.50)      | 1261 (1.49)          | 3.02             |
| Encounter for fitting and adjustment of other devices - Z46       | 470 (2.69)      | 752 (0.89)           | 3.02             |
| Other disorders of fluid, electrolyte and acid-base balance - E87 | 1310 (7.49)     | 2101 (2.49)          | 3.01             |

COPD, chronic obstructive pulmonary disease

**Table S3 Percent of patients with comorbidities in case-control population (>2.5 fold increase in COPD; 2 years before and after index date)**

| Disease                                                                                     | COPD population | Reference population | Factor increased |
|---------------------------------------------------------------------------------------------|-----------------|----------------------|------------------|
| Acute kidney failure - N17                                                                  | 689 (3.94)      | 1115 (1.32)          | 2.98             |
| Atherosclerosis - I70                                                                       | 1301 (7.44)     | 2147 (2.54)          | 2.93             |
| Non-pressure chronic ulcer of lower limb, not elsewhere classified - L97                    | 795 (4.55)      | 1368 (1.62)          | 2.81             |
| Pleural effusion, not elsewhere classified - J90                                            | 621 (3.55)      | 1078 (1.28)          | 2.77             |
| Osteoporosis without current pathological fracture - M81                                    | 1450 (8.30)     | 2552 (3.02)          | 2.75             |
| Unspecified kidney failure - N19                                                            | 599 (3.43)      | 1055 (1.25)          | 2.74             |
| Viral and other specified intestinal infections - A08                                       | 431 (2.47)      | 759 (0.90)           | 2.74             |
| Edema, not elsewhere classified - R60                                                       | 1587 (9.08)     | 2805 (3.32)          | 2.73             |
| Alcohol related disorders - F10                                                             | 1741 (9.96)     | 3098 (3.67)          | 2.71             |
| Osteoporosis with current pathological fracture - M80                                       | 809 (4.63)      | 1452 (1.72)          | 2.69             |
| Occlusion and stenosis of pre-cerebral arteries, not resulting in cerebral infarction - I65 | 504 (2.88)      | 922 (1.09)           | 2.64             |
| Other complications of surgical and medical care, not elsewhere classified - T88            | 582 (3.33)      | 1107 (1.31)          | 2.54             |
| Esophagitis - K20                                                                           | 444 (2.54)      | 846 (1.00)           | 2.54             |
| Unspecified acute lower respiratory infection - J22                                         | 3634 (20.79)    | 7016 (8.31)          | 2.5              |

COPD, chronic obstructive pulmonary disease

**Table S4 Time to first exacerbation (any) with the presence of comorbidities vs. no comorbidities in COPD patients**

| Comorbidity in COPD patients | Hazard ratio (95% CI)    | p-value |
|------------------------------|--------------------------|---------|
| Heart failure                | 1.40 (95% CI 1.33 :1.47) | <.0001  |
| Ischemic heart disease       | 1.26 (95% CI 1.20 :1.32) | <.0001  |
| Hypertension                 | 1.10 (95% CI 1.07 :1.14) | <.0001  |
| Depression                   | 1.06 (95% CI 0.99 :1.14) | 0.0913  |
| Anxiety                      | 1.10 (95% CI 1.01 :1.19) | 0.0342  |
| Sleep disorders              | 1.04 (95% CI 0.92 :1.16) | 0.5557  |
| Osteoporosis                 | 1.12 (95% CI 1.02 :1.24) | 0.0151  |
| Lung cancer                  | 1.56 (95% CI 1.40 :1.73) | <.0001  |
| Stroke                       | 1.33 (95% CI 1.21 :1.47) | <.0001  |
| Osteoarthritis               | 1.00 (95% CI 0.93 :1.07) | 0.9360  |
| Asthma                       | 1.18 (95% CI 1.13 :1.23) | <.0001  |

CI, confidence interval; COPD, chronic obstructive pulmonary disease

**Table S5 Direct and indirect costs in relation to comorbidities in patients aged 60-65 years (€/year)**

| Comorbidity           | COPD with comorbidity | Reference with comorbidity | Difference in costs (fold increase) |
|-----------------------|-----------------------|----------------------------|-------------------------------------|
| <b>Total costs</b>    |                       |                            |                                     |
| Osteoporosis          | 57,853 (n=151)        | 7,619 (n=293)              | 50,234 (8×)                         |
| Heart failure         | 56,804 (n=259)        | 20,339 (n=394)             | 36,465 (3×)                         |
| Sleep disorders       | 42,737 (n=207)        | 986 (n=780)                | 41,751 (43×)                        |
| <b>Direct costs</b>   |                       |                            |                                     |
| Osteoporosis          | 44,617 (n=198)        | 7,295 (n=319)              | 37,322 (6×)                         |
| Heart failure         | 39,620 (n=432)        | 12,864 (n=532)             | 26,756 (3×)                         |
| Sleep disorders       | 31,734 (n=248)        | 986 (n=818)                | 30,748 (32×)                        |
| <b>Indirect costs</b> |                       |                            |                                     |
| Osteoporosis          | 13,236 (n=151)        | NA                         | NA                                  |
| Heart failure         | 17,184 (n=259)        | NA                         | NA                                  |
| Sleep disorders       | 11,003 (n=207)        | NA                         | NA                                  |

COPD, chronic obstructive pulmonary disease; NA, not available
